# Supplementary material
Source: PubMed Central journal article supplement (PMC3568604)
Supplement: AEM.03011-12_zam999104115so1.pdf [file AEM.03011-12_zam999104115so1.pdf]

| Jird groups:             | Jird number: | Day -60 | Day -1 | Day 1       | Day 8 | Day 15                              | Day 18                               | Day 19 | Day 22 | Day 29 | Day 37 | Day 50 | Day 64 | Day 78 | Day 98 | Day 108 | Day 152 | Day 169 | Day 185 |     |
|--------------------------|--------------|---------|--------|-------------|-------|-------------------------------------|--------------------------------------|--------|--------|--------|--------|--------|--------|--------|--------|---------|---------|---------|---------|-----|
| Naturally infected jirds | MP7          | 200     | 200    |             | 200   | First application of fleas on jirds | 200                                  |        | 500    | 40     | 50     | 1000   | 700    | 400    | 80     | 20      | 0       | 0       | 0       |     |
|                          | MP8          | 1000    | 1000   |             | 1000  |                                     | 100                                  |        | 300    | 700    | 60     | 600    | 20     | ND     | 100    | 70      | 200     | 0       | 0       |     |
| Inoculated jirds         | MB9          | 0       | 0      | Inoculation | 500   |                                     | 500                                  |        | 1000   | ND     | 300    | 300    | 300    | ND     | 200    | 1000    | 60      | 0       | 0       |     |
|                          | MB10         | 0       | 0      |             | 1000  |                                     | 1000                                 |        | 1000   | 1000   | ND     | 100    | 600    | 1000   | 600    | 400     | 30      | 0       | 0       |     |
|                          | MB11         | 0       | 0      |             | 1000  |                                     | 500                                  |        | 300    | 200    | ND     | 100    | 30     | 900    | 700    | 100     | ND      | 600     | 0       |     |
|                          | MB12         | 0       | 0      |             | 400   |                                     | 400                                  |        | 80     | 100    | 1000   | 700    | 700    | 1000   | ND     | 300     | 500     | 0       | 0       |     |
|                          | MB13         | 0       | 0      |             | 200   |                                     | 200                                  |        | 50     | ND     | 40     | ND     | 800    | 400    | 1000   | 600     | 0       | 0       | 0       |     |
|                          | MB14         | 0       | 0      |             | 80    |                                     | 800                                  |        | 900    | 40     | 70     | 90     | 400    | 100    | 200    | 700     | 80      | 0       | 0       |     |
| Flea infected jirds      | MN1          | 0       | 0      |             | 0     |                                     | Second application of fleas on jirds | 0      |        | 50     | 0      | 600    | 500    | 500    | 70     | 20      | ND      | 100     | 0       | 0   |
|                          | MN2          | 0       | 0      |             | 0     |                                     |                                      | 0      |        | 0      | 100    | 300    | 900    | ND     | 800    | 500     | ND      | 1000    | 800     | 100 |
|                          | MN3          | 0       | 0      |             | 0     |                                     |                                      | 0      |        | 300    | 400    | 0      | 400    | 500    | 400    | 600     | 600     | 400     | 0       | 0   |
|                          | MN4          | 0       | 0      |             | 0     |                                     |                                      | 0      |        | 1000   | 0      | 900    | 80     | 900    | 100    | 400     | 900     | 0       | 0       | 0   |
|                          | MN5          | 0       | 0      |             | 0     |                                     |                                      | 0      |        | 0      | 0      | 200    | ND     | 100    | 600    | 50      | 70      | 80      | 0       | 0   |
|                          | MN6          | 0       | 0      |             | 0     |                                     |                                      | 0      |        | 0      | 800    | 1000   | 500    | 500    | ND     | ND      | 1000    | 300     | 0       | 0   |
|                          | MN15         |         |        |             |       | 0                                   |                                      |        | 0      | 60     | 900    | 200    | 20     | 500    | 600    | 40      | 200     | 0       | 0       |     |
| Negative control jirds   | MN16         |         |        |             |       |                                     |                                      |        | 0      | 0      | 0      | 0      | 0      | 0      | 0      | 0       | 0       | 0       | 0       |     |
|                          | MN17         |         |        |             |       |                                     |                                      |        | 0      | 0      | 0      | 0      | 0      | 0      | 0      | 0       | 0       | 0       | 0       |     |
|                          | MN18         |         |        |             |       |                                     |                                      |        | 0      | 0      | 0      | 0      | 0      | 0      | 0      | 0       | 0       | 0       | 0       |     |
|                          | MN19         |         |        |             |       |                                     |                                      |        | 0      | 0      | 0      | 0      | 0      | 0      | 0      | 0       | 0       | 0       | 0       |     |
|                          | MN20         |         |        |             |       |                                     |                                      |        | 0      | 0      | 0      | 0      | 0      | 0      | 0      | 0       | 0       | 0       | 0       |     |

**Supplementary table S1:** Results of *Bartonella* blood cultures (in colony forming units per 0.2ml blood), from all jirds during the experiment. MP7-8 represent naturally infected *Bartonella* jirds; MB9-14 represent experimentally infected jirds; MN1-6 represent *Bartonella* negative jirds infested by *Bartonella* positive fleas; MN15-20 represent *Bartonella* negative jirds; Inoculation of jirds occurred on day 1; First application of fleas on jirds occurred on day 15; Second application of fleas on jirds occurred on day 19; ND Not done.
